# Supplementary material
Source: HighWire-hosted journal article supplement (https://erj.ersjournals.com/content/58/3/2003957)
Supplement: inline-supplementary-material-1 [file inline-supplementary-material-1.pdf]

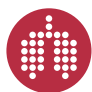

# Endothelial cells in the pathogenesis of pulmonary arterial hypertension

SHAREABLE PDF

Colin E. Evans<sup>1,2</sup>, Nicholas D. Cober<sup>3,4</sup>, Zhiyu Dai<sup>1,2,5</sup>, Duncan J. Stewart<sup>3,4</sup> and You-Yang Zhao<sup>1,2,6,7,8</sup>

<sup>1</sup>Program for Lung and Vascular Biology, Section of Injury Repair and Regeneration, Stanley Manne Children's Research Institute, Ann & Robert H. Lurie Children's Hospital of Chicago, Chicago, IL, USA. <sup>2</sup>Dept of Pediatrics, Division of Critical Care, Northwestern University Feinberg School of Medicine, Chicago, IL, USA. <sup>3</sup>Regenerative Medicine Program, Ottawa Hospital Research Institute, Ottawa, ON, Canada. <sup>4</sup>Dept of Cellular and Molecular Medicine, Faculty of Medicine, University of Ottawa, Ottawa, ON, Canada. <sup>5</sup>Dept of Internal Medicine, College of Medicine-Phoenix, University of Arizona, Phoenix, AZ, USA. <sup>6</sup>Dept of Pharmacology, Northwestern University Feinberg School of Medicine, Chicago, IL, USA. <sup>7</sup>Dept of Medicine, Division of Pulmonary and Critical Care Medicine, Northwestern University Feinberg School of Medicine, Chicago, IL, USA. <sup>8</sup>Feinberg Cardiovascular and Renal Research Institute, Northwestern University Feinberg School of Medicine, Chicago, IL, USA.

Corresponding author: You-Yang Zhao ([youyang.zhao@northwestern.edu](mailto:youyang.zhao@northwestern.edu))

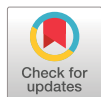

Shareable abstract (@ERSpublications)

**Dysfunctional endothelial cells play an important role in initiating and progressing PAH by impacting on multi-aspects of vascular remodelling and vasoconstriction. EC-targeted therapy may be effective in inhibiting vascular remodelling to treat PAH.** <https://bit.ly/3nXPvMB>

**Cite this article as:** Evans CE, Cober ND, Dai Z, *et al.* Endothelial cells in the pathogenesis of pulmonary arterial hypertension. *Eur Respir J* 2021; 58: 2003957 [DOI: 10.1183/13993003.03957-2020].

This single-page version can be shared freely online.

## Abstract

Pulmonary arterial hypertension (PAH) is a devastating disease that involves pulmonary vasoconstriction, small vessel obliteration, large vessel thickening and obstruction, and development of plexiform lesions. PAH vasculopathy leads to progressive increases in pulmonary vascular resistance, right heart failure and, ultimately, premature death. Besides other cell types that are known to be involved in PAH pathogenesis (*e.g.* smooth muscle cells, fibroblasts and leukocytes), recent studies have demonstrated that endothelial cells (ECs) have a crucial role in the initiation and progression of PAH. The EC-specific role in PAH is multi-faceted and affects numerous pathophysiological processes, including vasoconstriction, inflammation, coagulation, metabolism and oxidative/nitrative stress, as well as cell viability, growth and differentiation. In this review, we describe how EC dysfunction and cell signalling regulate the pathogenesis of PAH. We also highlight areas of research that warrant attention in future studies, and discuss potential molecular signalling pathways in ECs that could be targeted therapeutically in the prevention and treatment of PAH.

Copyright ©The authors 2021. For reproduction rights and permissions contact [permissions@ersnet.org](mailto:permissions@ersnet.org)

Received: 27 Oct 2020  
Accepted: 13 Jan 2021
